1  
2  
3  
4  
5  
6  
7  
10  
11  
12  
13  
14  
15  
16  
17  
18  
19  
20  
21  
22  
23

# **KKL-35 exhibits potent antibiotic activity against *Legionella* species independently of trans-translation inhibition**

Running title: Antibiotic activity of KKL-35 on *Legionella pneumophila*

Romain Brunel<sup>1</sup>, Ghislaine Descours<sup>2,3</sup>, Patricia Doublet<sup>2</sup>, Sophie Jarraud<sup>2,3</sup> and Xavier Charpentier<sup>1\*</sup>

<sup>1</sup> CIRI, Centre International de Recherche en Infectiologie, Team “Horizontal gene transfer in bacterial pathogens”, Inserm, U1111, Université Claude Bernard Lyon 1, CNRS, UMR5308, École Normale Supérieure de Lyon, Univ Lyon, 69100, Villeurbanne, France

<sup>2</sup> CIRI, Centre International de Recherche en Infectiologie, Team “Pathogenesis of *Legionella*”, Inserm, U1111, Université Claude Bernard Lyon 1, CNRS, UMR5308, École Normale Supérieure de Lyon, Univ Lyon, 69008, Lyon, France

<sup>3</sup> Centre National de Référence des Légionelles, Centre de Biologie et de Pathologie Est, 59 Boulevard Pinel, 69677 Bron Cedex, France

\* Corresponding author

E-mail: [xavier.charpentier@univ-lyon1.fr](mailto:xavier.charpentier@univ-lyon1.fr)

## Abstract

25

26 Trans-translation is a ribosome rescue system that is ubiquitous in bacteria. A new family of oxadiazole  
 27 compounds that inhibit trans-translation have been found to have broad-spectrum antibiotic activity. We  
 28 sought to determine the activity of KKL-35, a potent member of the oxadiazole family, against the  
 29 human pathogen *Legionella pneumophila* and other related species that can also cause Legionnaire's  
 30 disease (LD). Consistent with the essential nature of trans-translation in *L. pneumophila*, KKL-35  
 31 inhibits growth of all tested *L. pneumophila* strains at sub-micromolar concentrations, and is active  
 32 against other LD-causing *Legionella* species. KKL-35 is also active against *L. pneumophila* mutants  
 33 that have evolved resistance to macrolides. KKL-35 exhibits bactericidal activity at the minimal  
 34 inhibitory concentration (MIC) on all tested strains. KKL-35 inhibits multiplication of *L. pneumophila*  
 35 in human macrophages at several stages of infection. No resistant mutants could be obtained, even  
 36 during extended and chronic exposure, suggesting that resistance is not easily acquirable. Surprisingly,  
 37 KKL-35 is not synergistic with other ribosome-targeting antibiotics, and remains active against *L.*  
 38 *pneumophila* mutants lacking tmRNA, the essential component of trans-translation. These results  
 39 indicate that the antibiotic activity of KKL-35 is not related to the specific inhibition of trans-  
 40 translation and its mode of action remains to be identified. In conclusion, KKL-35 displays strong  
 41 antibiotic activity against the human pathogen *L. pneumophila*, including in an intracellular infection  
 42 model and with no detectable resistance.

43

44

45

## 46 Introduction

47

48 *Legionella pneumophila* is a ubiquitous freshwater bacterium that infects a wide spectrum of  
 49 environmental protozoans. Human-made systems such as sanitary water networks and air-cooling  
 50 towers can disseminate contaminated water through aerosolization. Breathing microscopic droplets  
 51 contaminated with *L. pneumophila* can lead to infection of alveolar macrophages and development of a  
 52 life-threatening pneumonia called Legionnaire's disease (LD) or Legionellosis. LD remains an  
 53 important cause of both morbidity and mortality in Europe with over 6900 cases reported in 2014<sup>1</sup>.  
 54 Guidelines for the management of LD recommend the use of macrolides (with a preference for  
 55 azithromycin) or fluoroquinolones (levofloxacin/moxifloxacin) to treat the infection<sup>2,3</sup>. Despite a rapid  
 56 diagnosis and the correct administration of antibiotics, death rate of LD is over 10%<sup>4</sup>. *L. pneumophila*  
 57 isolates are considered susceptible to macrolides and fluoroquinolones<sup>5</sup> but mutants resistant to both  
 58 antibiotic families can be easily obtained *in vitro*, suggesting that resistant strains may emerge during  
 59 treatment<sup>6-8</sup>. Indeed, resistance to fluoroquinolones acquired in the course of a fluoroquinolone therapy  
 60 has been recently reported<sup>9,10</sup>. New compounds active against *L. pneumophila* resistant to  
 61 fluoroquinolones and macrolides or that could potentiate these existing treatments may improve the  
 62 outcome of the disease.

63 Trans-translation has recently been proposed as a novel target for the development of a new  
 64 class of antibiotics<sup>11</sup>. Trans-translation is the primary bacterial mechanism to resolve ribosome stalling  
 65 in bacteria<sup>12-14</sup>. Ribosome stalling can be induced by ribosome-targeting antibiotics, lack of necessary  
 66 tRNAs, or translation of an mRNA lacking a stop codon (non-stop mRNA) and is a life-threatening  
 67 issue in metabolically active bacteria<sup>15,16</sup>. Trans-translation is operated by a highly conserved  
 68 nucleoprotein complex<sup>17</sup> encoded by two genes: *ssrA* encoding a highly expressed and structured RNA  
 69 called tmRNA<sup>18,19</sup>, and *smpB* encoding a small protein involved in specific recognition and loading of  
 70 tmRNA in stalled ribosomes<sup>20-22</sup>. Once the complex is loaded in the free A site, translation resumes  
 71 using the coding section of the tmRNA as template. This messenger section of tmRNA encodes a  
 72 degradation tag that is appended to the unfinished polypeptide, targeting it to different proteases<sup>23-25</sup>.  
 73 The coding section of tmRNA ends with a stop codon, allowing normal termination of translation and  
 74 dissociation of the ribosomal subunits. In addition, the tmRNA-SmpB complex interacts with RNase R  
 75 to degrade the faulty mRNA<sup>26,27</sup>. Thus, in addition to resolving ribosome stalling, the trans-translation

76 system prevents the rise of further problems by promoting the degradation of both the problematic  
77 mRNA and the aborted polypeptide<sup>28</sup>.

78       Alternative ribosome rescue systems have been identified in *Escherichia coli* and named ArfA  
79 and ArfB (Alternative rescue factors A and B)<sup>29,30</sup>. Both ArfA and ArfB can partially complement the  
80 loss of trans-translation by promoting dissociation of the stalled ribosome but lack mechanisms to  
81 trigger degradation of the aborted polypeptide and faulty mRNA<sup>12</sup>. These appear less conserved than  
82 the tmRNA-SmpB system<sup>15</sup>. Trans-translation is essential in species lacking alternative mechanisms<sup>16</sup>.  
83 In agreement with these observations, alternative ribosome-rescue systems are absent in members of  
84 the *Legionellaceae* genus and we indeed found that trans-translation is essential for *L. pneumophila*  
85 growth and infection of its cellular host<sup>31</sup>. In *L. pneumophila*, expressing the alternate rescue factor  
86 ArfA from *E. coli* can compensate for the loss of trans-translation activity indicating that the ribosome-  
87 dissociating activity of the trans-translation system is the sole function required for viability<sup>31</sup>. Because  
88 it is essential for viability in multiple pathogens, the trans-translation system has been proposed as a  
89 valid, yet-unexplored target for a new class of antibiotics<sup>11</sup>.

90       A high-throughput screen using an *in vivo* assay of trans-translation recently identified a family  
91 of small molecule able to inhibit trans-translation at micromolar concentrations<sup>32</sup>. One of the most  
92 active compounds, KKL-35, was found to exhibit a bactericidal activity against several pathogenic  
93 bacterial species in which trans-translation was known to be essential<sup>32</sup>. KKL-35 and two related  
94 compounds KKL-10 and KKL-40 display antibiotic activity against the intracellular pathogen  
95 *Francisella tularensis* during infection of its host<sup>33</sup>. However, the specificity of action of the molecules  
96 has not been confirmed in this species. The present study assessed KKL-35 activity *in vitro* against the  
97 intracellular pathogen, *L. pneumophila*. MIC and MBC values were determined for a set of *Legionella*  
98 species and strains. We report that KKL-35 exhibits potent bactericidal activity against *L. pneumophila*  
99 *in vitro* at very low concentrations and is able to stop bacterial multiplication in a model of infection of  
100 human macrophages. Yet, multiple evidence indicates that KKL-35 does not target trans-translation  
101 and, as such, its true target(s) remains to be identified.

102

103

104

## 105 **Materials and methods**

106

## 107 **Strains, growth media and antibiotics used**

108 Strains used in this study included clinical isolates of *L. pneumophila* of strains Paris (CIP  
109 107629), Lens (CIP 108286), Philadelphia-1, Lorraine (CIP 108729) and 130b, as well as isolates of *L.*  
110 *longbeachae*, *L. dumoffii*, *L. micdadei*. *L. pneumophila* str. Paris resistant to erythromycin or  
111 azithromycin were obtained from a previous work<sup>8</sup>. *L. pneumophila* Paris was transformed with the  
112 plasmid pX5, a pMMB207C derivative harboring the *gfp+* gene under a strong constitutive promoter  
113 and used for live monitoring of intracellular multiplication by fluorescence reading. The tmRNA  
114 mutant strains *ssrA*<sup>ind</sup> and *ssrA*<sup>ind</sup>/pArfA were previously described<sup>31</sup>. ACES-Yeast Extract broth  
115 medium (AYE) was prepared with 10 g/L ACES (*N*-(2-acetamido)-2-aminoethanesulfonic acid), 12g/L  
116 yeast extract, 0.3 g/L iron III pyrophosphate and 0.5 g/L L-cysteine. pH was adjusted at 6.9 with KOH  
117 and the solution was filter-sterilized and kept away from light, at 4°C. ACES-buffered charcoal yeast  
118 extract (CYE) plates were prepared with 10g/L ACES and 10g/L granulated yeast extract autoclaved  
119 together, 30 g/L agar and 4 g/L charcoal autoclaved together, and complemented with 0.25 g/L filtered  
120 iron III nitrate and 0.4 g/L L-cysteine. Unless indicated otherwise, cultures on CYE were incubated for  
121 72h at 37°C in air, then patched onto CYE again for 24h to obtain fresh cultures before experiments  
122 were performed. When appropriate, chloramphenicol (5 µg/mL) was added to the medium. A stock  
123 solution of KKL-35 (Ambinter, Orléans, France) was prepared at 10 mM (3.2 g/L) in dimethylsulfoxide  
124 (DMSO) and stored at -20°C.

## 125 **Time-kill assay, determination of MIC and MBC**

126 For the time-kill assay, *L. pneumophila* strain Paris was resuspended in AYE medium at 3.10<sup>6</sup>  
127 CFU/mL with a range of two-fold dilutions of KKL-35. Tubes were then incubated at 37°C in air, with  
128 shaking. Every 24h, serial dilutions were plated on CYE agar and CFUs were counted. For MIC  
129 determination, no CSLI guidelines are available for testing antibiotic susceptibility of *Legionella*  
130 strains. EUCAST guidelines were recently published but are based on the gradient strip test. KKL-35  
131 strip tests are not commercially available, and we found the charcoal of CYE medium to seriously  
132 impede KKL-35 activity. Therefore, we used the previously described AYE broth microdilution method  
133 for MIC and MBC determination<sup>34</sup>. Briefly, strains were resuspended in AYE medium and placed into

the wells of a 96-well polystyrene plate and a range of twofold dilutions of KKL-35 was added to the cultures. The inoculum ( $10^6$  CFU/mL) was verified by plating and counting of serial dilutions of the cultures at the beginning of the experiment. The 96-well plate was sealed with a Breathe-Easy® membrane (Sigma-Aldrich) to prevent evaporation and was incubated for 48h at 37°C in air with no agitation. At 48h, MICs were determined visually as the lowest concentrations inhibiting bacterial growth. Cultures from all wells with concentration higher or equal the MIC were collected, serially diluted and plated onto CYE agar for counting. MBC was defined as the minimal concentration at which 99.9% of bacteria were killed. A bactericidal effect was defined by a MBC/MIC ratio  $\leq 4$ .

## Evaluation of synergistic activity

The checkerboard broth microdilution method was used to evaluate a possible synergistic activity between KKL-35 and chloramphenicol and erythromycin on *L. pneumophila* strain Paris. Bacteria were inoculated in AYE medium in a 96-well polystyrene plate containing a twofold range of concentration of KKL-35 in columns, crossing a range of another antibiotic in rows. The plate was then incubated for 48h in a Tecan Infinite M200Pro Reader at 37°C, with both agitation and absorbance reading at 600nm every 10 minutes. Growth value was defined as the highest absorbance reading recorded during the growth kinetic. Compared to the classic qualitative evaluation of growth by visual observation, this method allowed us to obtain a quantitative measure of growth. Growth inhibition was defined as a maximal absorbance value  $<10\%$  the value of the positive control. Fractional Inhibitory Concentration Index (FICI) were interpreted in the following way:  $FICI \leq 0.5$  = synergy;  $FICI > 4.0$  = antagonism;  $FICI > 0.5-4$  = no interaction<sup>35</sup>.

## Activity of KKL-35 on intracellular growth

U937 cells grown in RPMI 1640 containing 10% fetal calf serum (FCS) were differentiated into human macrophages by addition of phorbol 12-myristate 13-acetate (PMA) at 100 ng/mL, then seeded into 96-well polystyrene plates for 3 days ( $10^6$  cells/well). 4 hours before infection the medium was replaced with fresh medium + 10% FCS. *L. pneumophila* str. Paris was plated from a glycerol stock at -80°C onto CYE and incubated at 37°C in air for 72h, then plated again onto CYE plates for 24h to obtain a fresh culture. 4 hours before infection, bacteria were resuspended in RPMI 1640 and incubated at 37°C. Infection of macrophages was performed by replacing their medium by RPMI 1640 + 2% FCS containing *L. pneumophila* at a multiplicity of infection of 10. Plates were centrifuged 10 min at 1000 g then incubated at 37°C with 5% CO<sub>2</sub> for 72h. Micrographs were taken with an inverted microscope (Nikon Eclipse TS100). Live monitoring of infection of U937 macrophages was performed as

described above, except that the GFP-producing *L. pneumophila* str. Paris pX5 was used, and that the infection was performed in CO<sub>2</sub>-independent medium after differentiation, and was monitored by a Tecan Infinite M200Pro plate reader. The plate was incubated in the reader at 37°C and GFP fluorescence levels were automatically monitored every hour for 72h at an excitation wavelength of 470nm, and emission wavelength of 520nm.

## **Selection of resistant mutants by serial passages**

Two different lineages were founded from *L. pneumophila* str. Paris and propagated by serial passages in the presence of KKL-35 or norfloxacin, as previously described<sup>7,8</sup>. Briefly, a suspension of *L. pneumophila* str. Paris in AYE was added to a concentration of 10<sup>8</sup> CFU/mL in a 24-well polystyrene plate with twofold KKL-35 or norfloxacin concentrations ranging from 0.5 times to 8 times the MIC that was determined for the parental strain (norfloxacin: 0.25 mg/L, KKL-35: 0.04 mg/L). Plates were sealed with a Breathe-Easy® membrane (Sigma-Aldrich) and incubated for four days at 37°C in air without agitation, after which the minimum inhibitory concentration was noted for each antibiotic. Bacteria from the well with the highest antibiotic concentration in which growth was observable were transferred using a 1:40 dilution to a new plate containing twofold KKL-35 or norfloxacin concentrations ranging from 0.5 to 8 times the MIC of the previous cycle. Serial passages were repeated 10 times, and the experiment was performed twice independently.

## 182 Results

### 183 KKL-35 inhibits *Legionella* growth *in vitro*

184 MIC and MBC of KKL-35 were determined *in vitro* on five *L. pneumophila* strains and three  
 185 non-*pneumophila* species causing LD ([Table 1](#)). KKL-35 strongly inhibited growth of all tested  
 186 species, with the highest observed MIC of 5 mg/L for *Legionella micdadei*. KKL-35 was particularly  
 187 potent against the species *Legionella pneumophila*, with all tested strains exhibiting a MIC around 0.04  
 188 mg/L. MBC ranged from one time to two times the MIC for all tested strains, indicating a bactericidal  
 189 activity. A time-kill assay on *L. pneumophila* str. Paris showed a decrease in viability at 24h after  
 190 addition of KKL-35 at concentrations equal or higher than MIC ([Figure 1](#)). At 72h following addition  
 191 of KKL-35 at the MIC, the viable count was reduced by four orders of magnitude. Exposure to a half-  
 192 MIC led to transient bacteriostatic activity for 48h, but then followed by growth suggesting that KKL-  
 193 35 degrades and loses activity under those conditions. We also tested KKL-35 against twelve *L.*  
 194 *pneumophila* mutants that were evolved from the Paris strain to become highly resistant to  
 195 erythromycin and azithromycin (4000-fold increase in MIC)<sup>8</sup>. The MIC of KKL-35 on these mutants  
 196 was identical to that of the parent strain (0.04 mg/L) and thus unaffected by ribosomal mutations  
 197 involved in macrolide resistance (23S rRNA, L4 and L22 proteins mutations).

### 198 KKL-35 inhibits intracellular growth of *L. pneumophila*

199 *L. pneumophila* can infect human macrophages and replicate extensively within a membrane-bound  
 200 compartment until cell lysis. Two molecules, KKL-10 and KKL-40, structurally related to KKL-35  
 201 were found to be non-toxic to macrophages at concentrations up to 19 mg/L<sup>33</sup>. Indeed, we found that  
 202 KKL-35 at 10 mg/L protected monocyte-derived macrophages from killing by *L. pneumophila* at a  
 203 multiplicity of infection (MOI) of 10 ([Figure 2](#), panel A). In order to better characterize the inhibitory  
 204 activity of KKL-35, we followed the replication of GFP-expressing *L. pneumophila* in monocyte-  
 205 derived macrophages<sup>36</sup>. Within minutes of forced contact with macrophages, *L. pneumophila* is  
 206 internalized in a vacuolar compartment that escapes fusion with lysosomes<sup>37,38</sup>. Addition of KKL-35 1h  
 207 after infection, when bacteria are intracellular but not yet multiplying, prevented *L. pneumophila*  
 208 replication at concentrations above 1 mg/L ([Figure 2](#), panel B). Moreover, addition of KKL-35 at later  
 209 timepoints (18 or 24h), when bacteria are actively dividing, stopped bacterial replication ([Figure 2](#),  
 210 panel B). Interestingly, KKL-35 appeared more potent when added to actively multiplying intracellular  
 211 bacteria ([Figure 2](#), panel B). This may indicate that either KKL-35 is more active against actively

dividing cells or that the active fraction of KKL-35 gradually decreases over time. In any case, the data show that KKL-35 inhibits replication of *L. pneumophila* within macrophages.

### **KKL-35 does not induce phenotypes associated with loss of trans-translation**

Lack of trans-translation increases the sensitivity to ribosome-targeting antibiotics in *E. coli*<sup>39,40</sup> and in *L. pneumophila*<sup>31</sup>. The *L. pneumophila* strains *ssrA*<sup>ind</sup> carrying an IPTG-inducible allele of the tmRNA-encoding gene *ssrA* is unable to grow if IPTG is not supplied in the medium<sup>31</sup>. Low levels of IPTG allow growth with artificially reduced levels of tmRNA, resulting in increased susceptibility to erythromycin and chloramphenicol<sup>31</sup>. Complete lack of trans-translation may further increase the sensitivity of *L. pneumophila* to these antibiotics. Thus, we anticipated that KKL-35 could be synergistic with erythromycin and chloramphenicol. To determine a potential synergy we performed a checkerboard analysis<sup>35</sup>. Interestingly, the MIC of erythromycin (0.125 mg/L) and chloramphenicol (1 mg/L) were not affected by KKL-35, indicating the absence of synergy (FICI=2). Thus, unlike the genetic alteration of trans-translation, KKL-35 does not potentiate activity of ribosome-targeting antibiotics. Another phenotype of *L. pneumophila* cells genetically deprived of tmRNA is extended filamentation, indicating that trans-translation is required for cell division<sup>31</sup>. In contrast to *L. pneumophila* cells defective for trans-translation, *L. pneumophila* cells treated with KKL-35 at, below, or above the MIC, still display normal morphology (Figure 3, panel A). The inability of KKL-35 to reproduce the phenotypes associated with loss of trans-translation suggests that its potent antibiotic activity is not primarily linked to inhibition of trans-translation.

### **KKL-35 is equally active on *L. pneumophila* lacking trans-translation**

To test whether the antibiotic activity of KKL-35 was linked to the inhibition of trans-translation, we tested KKL-35 on the *L. pneumophila* strains *ssrA*<sup>ind</sup>. When IPTG is supplied at high concentrations, tmRNA is expressed at near normal levels, and the strain grows like the wild-type strain. Expectedly, in the presence of IPTG this strain is equally sensitive to KKL-35 (MIC=0.04 mg/L) (Figure 3, panel B). In the absence of IPTG, this strain is strongly impaired for growth. Yet, despite its low levels of tmRNA, the strain is not more sensitive to KKL-35. Ectopic expression of the alternate ribosome-rescue system ArfA from *E. coli* can restore growth of the *ssrA*<sup>ind</sup> strain in the absence of IPTG. Under these conditions, the strain does not produce tmRNA and is therefore deficient for trans-translation<sup>31</sup>. Despite not requiring trans-translation for growth, the MIC of KKL-35 on this strain remained identical to that on the wild-type strain (Figure 3, panel B).

## 242 ***L. pneumophila* does not acquire resistance to KKL-35**

243 *In vitro* selection of resistance is a common way to identify and characterize potential resistance  
 244 determinants. Plating of large number of bacteria on solid medium containing antibiotic above the MIC  
 245 often allows isolation of resistant mutants when resistance is conferred by a single mutation (i.e.,  
 246 rifampicin, streptomycin). This strategy failed to produce mutants resistant to KKL-35. Continuous  
 247 culture of a bacterial population in increasing concentrations of antibiotics represents an alternate  
 248 approach when several mutations are required to confer resistance. In *L. pneumophila*, this method has  
 249 been used to characterize the mutational path to resistance to fluoroquinolones and macrolides<sup>7,8</sup>. In  
 250 agreement with previous reports, in two independent experiments, we here observed a 500-fold  
 251 increase in the MIC of norfloxacin in only six passages (about 30 generations) ([Figure 4](#)). In contrast,  
 252 no significant increase in the MIC of KKL-35 was obtained, even after 10 passages (over 60  
 253 generations) ([Figure 4](#)). Thus, in the tested experimental setup, *L. pneumophila* could not acquire  
 254 resistance to KKL-35.

## 255 **Discussion**

256 We investigated the effect of KKL-35 *in vitro* on several *Legionella* species, and found it to be  
 257 bactericidal on all tested strains. KKL-35 was especially potent on the different tested strains of *L.*  
 258 *pneumophila*, the species responsible for more than 90% of cases of LD, with a MIC of 0.04 mg/L  
 259 (0.125  $\mu$ M). The bactericidal effect of KKL-35 on *L. pneumophila* was observed at one or two times  
 260 the MIC and led to a progressive decline in cell viability over time. KKL-35 was found to retain a  
 261 normal activity on different tested strains of erythromycin-resistant *L. pneumophila*. There is  
 262 apparently no cross-resistance between macrolides and KKL-35, potentially providing an alternative  
 263 treatment option in case of the development of macrolide resistance in clinical isolates. In addition, and  
 264 in contrast to fluoroquinolones and macrolides, *L. pneumophila* did not develop resistance *in vitro*. This  
 265 result suggests that mutations of the gene encoding the target of KKL-35 may be highly detrimental for  
 266 the bacteria, and/or that several cellular components are targeted.

267 Related oxadiazoles (KKL-10 and KKL-40) were recently found to be able to stop intracellular  
 268 multiplication of *F. tularensis*<sup>33</sup>. In this report, KKL-35 was not tested on intracellular bacteria during  
 269 infection of human cells because of its lower solubility at efficient concentrations in the tested  
 270 conditions; we did not encounter solubility problems in our conditions at tested concentrations and up  
 271 to 10 times the *in vivo* MIC. KKL-35 stops multiplication of *L. pneumophila* str. Paris in monocyte-  
 272 derived human macrophages when added to the medium at T+1h, 18h or 24h after the beginning of the

infection. Interestingly, KKL-35 was more potent on actively-multiplying *L. pneumophila* at later stages of infection. This indicates that KKL-35 is able to cross the biological membranes of the macrophage to reach intracellular *L. pneumophila*. Macrophages exposed to KKL-35 for 72h at up to 10 times the *in vivo* MIC were protected from infection by *L. pneumophila*.

As trans-translation activity has been described to be involved in bacterial resistance to ribosome-targeting antibiotics<sup>31,39,40</sup>, we tested KKL-35 in combination with other antibiotics to assess their possible synergy. Contrary to what was expected, no synergy was found with ribosome-targeting antibiotics, whereas we previously found that a reduction in tmRNA levels led to an increased susceptibility of *L. pneumophila* to such antibiotics<sup>31</sup>. Similarly, *L. pneumophila* cells treated with KKL-35 for up to 24h did not display the filamentation phenotype observed in cells deprived of tmRNA. These results led to us to question the specific inhibition of trans-translation by KKL-35. KKL-35 was first identified in a high-throughput screen that aimed to identify molecules able to inhibit trans-translation activity *in vitro*<sup>32</sup>. Its antibacterial activity was discovered subsequently and is assumed to result from the inhibition of that pathway. However, we found evidence suggesting that trans-translation may not be the target of KKL-35 in *L. pneumophila*, or at least not its only target. Indeed, MICs were identical when tested on a wild-type strain of *L. pneumophila*, on an inducible mutant of the tmRNA-encoding gene exhibiting different levels of expression of that gene, or when the inhibition of tmRNA expression was complemented by an alternative ribosome rescue system (ArfA from *E. coli*). The molecular target of KKL-35 has not yet been identified. It is possible that in *L. pneumophila*, this target is not prone to support viable mutations. Normal translation may also be inhibited by KKL-35 in *L. pneumophila*, explaining why trans-translation does not seem involved. Alternatively, it could be that other important cellular mechanisms are inhibited in addition or instead of trans-translation, or that KKL-35 targets multiple cellular mechanisms. Other oxadiazoles of the same class seem to inhibit the degradation of unfinished proteins released from ribosomes rescued by trans-translation<sup>32</sup>. KKL-35 does not seem to inhibit this activity in *E. coli*, but it could be different in *L. pneumophila*. Additional studies are needed to better understand the mechanism of action of KKL-35, and to assess further the potential of oxadiazoles in treatment.

304

305 **Funding**

306 RB is the recipient of a doctoral fellowship from the French Ministry of Higher Education and  
307 Research. This study has been funded by a Research Grant 2015 by the European Society of Clinical  
308 Microbiology and Infectious Diseases (ESCMID) awarded to XC.

309

310 **Transparency declarations**

311 None to declare

312

313

## 314 **References**

315

1. European Centre for Disease Prevention and Control. *Legionnaires' disease in Europe, 2014*. Stockholm: ECDC; 2016.
2. Woodhead M, Blasi F, Ewig S, *et al*. Guidelines for the management of adult lower respiratory tract infections--full version. *Clin Microbiol Infect* 2011; **17 Suppl 6**: E1-59.
3. Mandell LA, Wunderink RG, Anzueto A, *et al*. Infectious Diseases Society of America/American Thoracic Society consensus guidelines on the management of community-acquired pneumonia in adults. *Clin Infect Dis* 2007; **44 Suppl 2**: S27-72.
4. Phin N, Parry-Ford F, Harrison T, *et al*. Epidemiology and clinical management of Legionnaires' disease. *The Lancet Infectious Diseases* 2014; **14**: 1011–21.
5. Onody C, Matsiota-Bernard P, Nauciel C. Lack of resistance to erythromycin, rifampicin and ciprofloxacin in 98 clinical isolates of *Legionella pneumophila*. *J Antimicrob Chemother* 1997; **39**: 815–6.
6. Jonas D, Engels I, Hartung D, Beyersmann J, Frank U, Daschner FD. Development and mechanism of fluoroquinolone resistance in *Legionella pneumophila*. *J Antimicrob Chemother* 2003; **51**: 275–80.
7. Almahmoud I, Kay E, Schneider D, Maurin M. Mutational paths towards increased fluoroquinolone resistance in *Legionella pneumophila*. *J Antimicrob Chemother* 2009; **64**: 284–93.
8. Descours G, Ginevra C, Jacotin N, *et al*. Ribosomal Mutations Conferring Macrolide Resistance in *Legionella pneumophila*. *Antimicrob Agents Chemother* 2017; **61**.
9. Shadoud L, Almahmoud I, Jarraud S, *et al*. Hidden Selection of Bacterial Resistance to Fluoroquinolones In Vivo: The Case of *Legionella pneumophila* and Humans. *EBioMedicine* 2015; **2**: 1179–85.
10. Bruin JP, Koshkolda T, IJzerman EPF, *et al*. Isolation of ciprofloxacin-resistant *Legionella pneumophila* in a patient with severe pneumonia. *J Antimicrob Chemother* 2014; **69**: 2869–71.
11. Keiler KC, Alumasa JN. The potential of trans-translation inhibitors as antibiotics. *Future Microbiol* 2013; **8**: 1235–7.
12. Keiler KC. Mechanisms of ribosome rescue in bacteria. *Nat Rev Micro* 2015; **13**: 285–97.
13. Himeno H, Nameki N, Kurita D, Muto A, Abo T. Ribosome rescue systems in bacteria. *Biochimie* 2015; **114**: 102–12.
14. Giudice E, Gillet R. The task force that rescues stalled ribosomes in bacteria. *Trends in Biochemical Sciences* 2013; **38**: 403–11.

15. Feaga HA, Viollier PH, Keiler KC. Release of nonstop ribosomes is essential. *MBio* 2014; **5**: e01916.
16. Keiler KC, Feaga HA. Resolving nonstop translation complexes is a matter of life or death. *J Bacteriol* 2014; **196**: 2123–30.
17. Hudson CM, Lau BY, Williams KP. Ends of the line for tmRNA-SmpB. *Front Microbiol* 2014; **5**: 421.
18. Felden B, Himeno H, Muto A, McCutcheon JP, Atkins JF, Gesteland RF. Probing the structure of the Escherichia coli 10Sa RNA (tmRNA). *RNA* 1997; **3**: 89–103.
19. Keiler KC, Waller PRH, Sauer RT. Role of a Peptide Tagging System in Degradation of Proteins Synthesized from Damaged Messenger RNA. *Science* 1996; **271**: 990–3.
20. Karzai AW, Susskind MM, Sauer RT. SmpB, a unique RNA-binding protein essential for the peptide-tagging activity of SsrA (tmRNA). *The EMBO Journal* 1999; **18**: 3793–9.
21. Sundermeier TR, Dulebohn DP, Cho HJ, Karzai AW. A previously uncharacterized role for small protein B (SmpB) in transfer messenger RNA-mediated trans-translation. *PNAS* 2005; **102**: 2316–21.
22. Felden B, Gillet R. SmpB as the handyman of tmRNA during trans-translation. *RNA Biology* 2011; **8**: 440–9.
23. Herman C, Thévenet D, Bouloc P, Walker GC, D'Ari R. Degradation of carboxy-terminal-tagged cytoplasmic proteins by the Escherichia coli protease HflB (FtsH). *Genes Dev* 1998; **12**: 1348–55.
24. Gottesman S, Roche E, Zhou Y, Sauer RT. The ClpXP and ClpAP proteases degrade proteins with carboxy-terminal peptide tails added by the SsrA-tagging system. *Genes Dev* 1998; **12**: 1338–47.
25. Dougan DA, Weber-Ban E, Bukau B. Targeted Delivery of an ssrA-Tagged Substrate by the Adaptor Protein SspB to Its Cognate AAA+ Protein ClpX. *Molecular Cell* 2003; **12**: 373–80.
26. Karzai AW, Sauer RT. Protein factors associated with the SsrA·SmpB tagging and ribosome rescue complex. *PNAS* 2001; **98**: 3040–4.
27. Richards J, Mehta P, Karzai AW. RNase R degrades non-stop mRNAs selectively in an SmpB-tmRNA-dependent manner. *Mol Microbiol* 2006; **62**: 1700–12.
28. Keiler KC. Biology of trans-Translation. *Annual Review of Microbiology* 2008; **62**: 133–51.
29. Chadani Y, Ono K, Kutsukake K, Abo T. Escherichia coli YaeJ protein mediates a novel ribosome-rescue pathway distinct from SsrA- and ArfA-mediated pathways. *Molecular Microbiology* 2011; **80**: 772–785.
30. Chadani Y, Ono K, Ozawa S, *et al.* Ribosome rescue by Escherichia coli ArfA (YhdL) in the absence of trans-translation system. *Molecular Microbiology* 2010; **78**: 796–808.
31. Brunel R, Charpentier X. Trans-translation is essential in the human pathogen Legionella pneumophila. *Scientific Reports* 2016; **6**: 37935.

32. Ramadoss NS, Alumasa JN, Cheng L, *et al.* Small molecule inhibitors of trans-translation have broad-spectrum antibiotic activity. *Proc Natl Acad Sci USA* 2013; **110**: 10282–7.
33. Goralski TDP, Dewan KK, Alumasa JN, *et al.* Inhibitors of Ribosome Rescue Arrest Growth of *Francisella tularensis* at All Stages of Intracellular Replication. *Antimicrob Agents Chemother* 2016; **60**: 3276–82.
34. Baltch AL, Smith RP, Ritz W. Inhibitory and bactericidal activities of levofloxacin, ofloxacin, erythromycin, and rifampin used singly and in combination against *Legionella pneumophila*. *Antimicrob Agents Chemother* 1995; **39**: 1661–6.
35. Odds FC. Synergy, antagonism, and what the checkerboard puts between them. *J Antimicrob Chemother* 2003; **52**: 1.
36. Kim E-H, Charpentier X, Torres-Urquidy O, McEvoy MM, Rensing C. The metal efflux island of *Legionella pneumophila* is not required for survival in macrophages and amoebas. *FEMS Microbiol Lett* 2009. Available at: <http://www.ncbi.nlm.nih.gov/gate1.inist.fr/pubmed/19895645>. Accessed December 8, 2009.
37. Roy CR, Berger KH, Isberg RR. *Legionella pneumophila* DotA protein is required for early phagosome trafficking decisions that occur within minutes of bacterial uptake. *Mol Microbiol* 1998; **28**: 663–74.
38. Wiater LA, Dunn K, Maxfield FR, Shuman HA. Early events in phagosome establishment are required for intracellular survival of *Legionella pneumophila*. *Infect Immun* 1998; **66**: 4450–60.
39. Luidalepp H, Hallier M, Felden B, Tenson T. tmRNA decreases the bactericidal activity of aminoglycosides and the susceptibility to inhibitors of cell wall synthesis. *RNA Biol* 2005; **2**: 70–4.
40. Li J, Ji L, Shi W, Xie J, Zhang Y. Trans-translation mediates tolerance to multiple antibiotics and stresses in *Escherichia coli*. *J Antimicrob Chemother* 2013; **68**: 2477–81.

# Figures and Table

**Figure 1.**

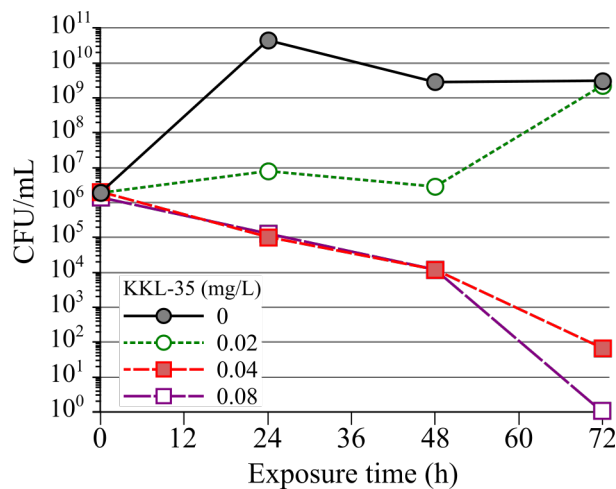

**Time-kill analysis of KKL-35 on *L. pneumophila*.** *L. pneumophila* strain Paris was resuspended in AYE medium at 3.10<sup>6</sup> CFU/mL with a range of two-fold dilutions of KKL-35. Tubes were then incubated at 37°C. Every 24h, serial dilutions were plated on CYE agar and CFUs were counted. Presented data are average of triplicate samples. Black filled circle, no KKL-35; green open circles, KKL-35 at 0.02 mg/L; red filled squared KKL-35 at 0.04 mg/L; purple open squares KKL-35 at 0.08 mg/L.

327

328

329 **Figure 2.**

330

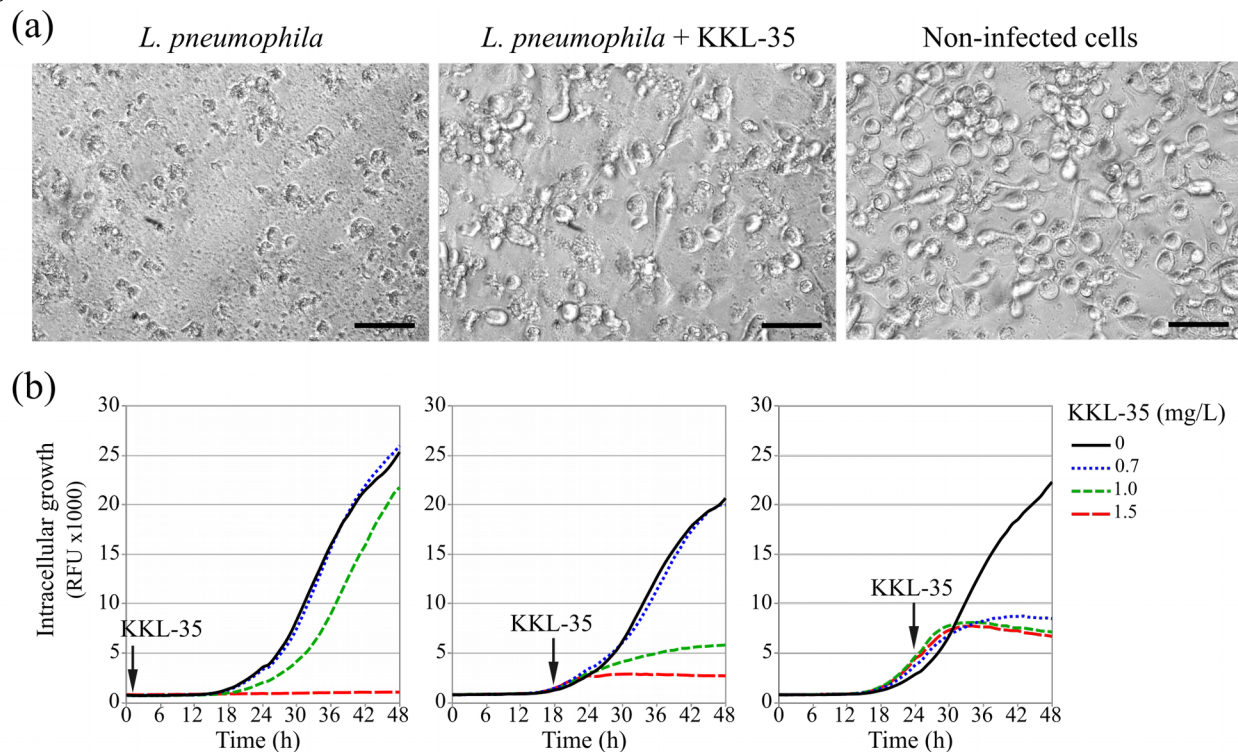

331 **Activity of KKL-35 on *L. pneumophila* in an intracellular infection model.** (a) Bright light  
332 microscopy imaging of U937-derived macrophages infected with *L. pneumophila* (MOI=10) for 72h in  
333 the presence of absence of KKL-35 at 10 mg/L. Black scale bar represents 50  $\mu$ m. (b) Live monitoring  
334 of infection of U937-derived macrophages by GFP-producing *L. pneumophila* str. Paris carrying  
335 plasmid pX5. KKL-35 was added at 1h, 18h or 24h post infection. GFP fluorescence levels were  
336 automatically monitored every hour for 48h. Black solid line, no KKL-35; blue short dashed line ,  
337 KKL-35 at 0.7 mg/L; green intermediate dashed line, KKL-35 at 1mg/L; red long dashed line, KKL-35  
338 at 1.5 mg/L. RFU, relative fluorescence units.

**Figure 3.**

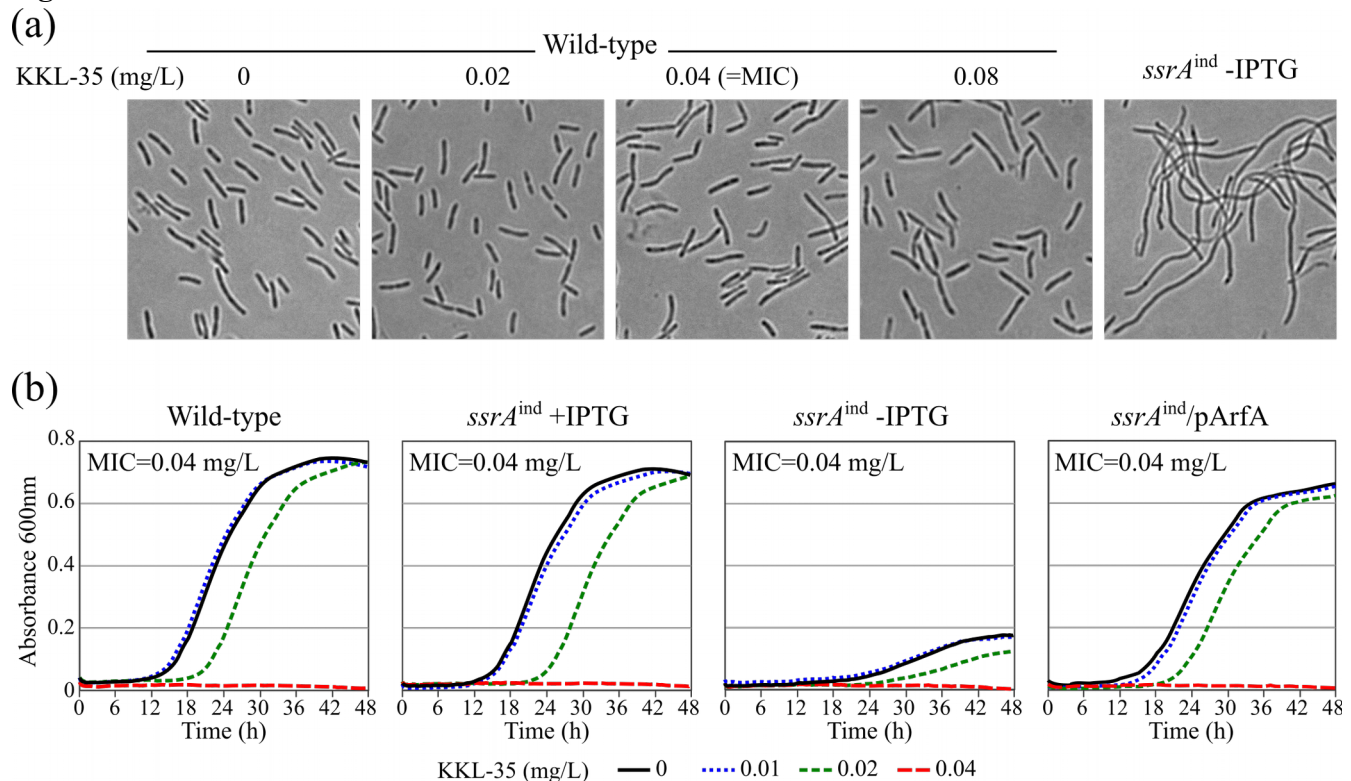

**KKL-35 does not primarily target trans-translation in *L. pneumophila*.** (a) Phase contrast light microscopy of wild-type *L. pneumophila* treated with KKL-35 for 24h and of the trans-translation deficient *ssrA*<sup>ind</sup> mutant deprived of IPTG for 24h. (b) Activity of KKL-35 on *L. pneumophila* strains deficient for trans-translation. Growth curve of the wild-type, *ssrA*<sup>ind</sup> mutant in the presence or absence of IPTG and of *ssrA*<sup>ind</sup> mutant rescued by expression of the *E. coli* ArfA. MIC were determined on the basis of absorbance reading. Black solid line, no KKL-35; blue short dashed line, KKL-35 at 0.01 mg/L; green intermediate dashed line, KKL-35 at 0.02 mg/L; red long dashed line, KKL-35 at 0.04 mg/L.

350

351 **Figure 4.**

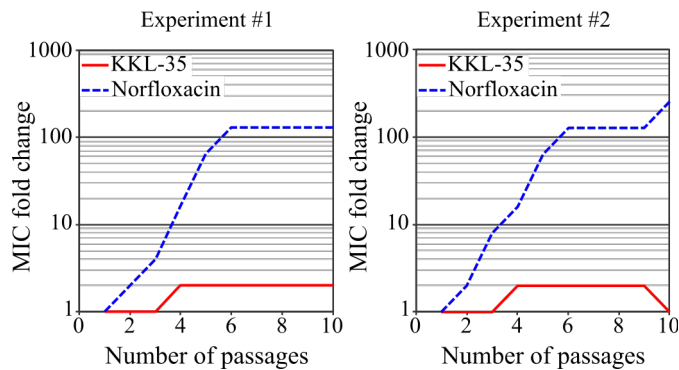

352 ***L. pneumophila* does not acquire resistance to KKL-35.** Two different lineages were founded from  
 353 *L. pneumophila* str. Paris and propagated by serial passages in the presence of KKL-35 (red solid line)  
 354 or norfloxacin (blue dashed line). MIC was determined at each passage and presented relative to the  
 355 initial MIC (norfloxacin: 0.25 mg/L, KKL-35: 0.04 mg/L).

356

357 **Table 1.** MIC and MBC of KKL-35 on several *Legionella* species *in vitro* (average and standard  
 358 deviation from three independent determinations).

| Strain                                  | Average MIC (mg/L)    | Average MBC (mg/L)    |
|-----------------------------------------|-----------------------|-----------------------|
| <i>L. pneumophila</i> str. Paris        | 0.04 ( $\pm 0$ )      | 0.04 ( $\pm 0$ )      |
| <i>L. pneumophila</i> str. Lens         | 0.04 ( $\pm 0$ )      | 0.08 ( $\pm 0$ )      |
| <i>L. pneumophila</i> str. Lorraine     | 0.04 ( $\pm 0$ )      | 0.04 ( $\pm 0$ )      |
| <i>L. pneumophila</i> str. Philadelphia | 0.067 ( $\pm 0.062$ ) | 0.067 ( $\pm 0.023$ ) |
| <i>L. pneumophila</i> str. 130b         | 0.04 ( $\pm 0$ )      | 0.04 ( $\pm 0$ )      |
| <i>Legionella longbeachae</i>           | 0.32 ( $\pm 0$ )      | 0.533 ( $\pm 0.185$ ) |
| <i>Legionella micdadei</i>              | 5.12 ( $\pm 0$ )      | 10.24 ( $\pm 0$ )     |
| <i>Legionella dumoffii</i>              | 2.56 ( $\pm 0$ )      | 5.12 ( $\pm 0$ )      |

359
